# Supplementary material for: Saliva-Dry LAMP: A Rapid Near-Patient Detection System for SARS-CoV-2.
Source: Research Square preprint supplement (doi:10.21203/rs.3.rs-141322/v1), 2021-01-18

**TITLE:** Saliva-Dry LAMP: A rapid near-patient detection system for SARS-CoV-2.

[Noah B. Toppings](#)<sup>1</sup>, [Abu Naser Mohon](#)<sup>1</sup>, [Yoonjung Lee](#)<sup>2</sup>, [Hitendra Kumar](#)<sup>2,3</sup>, [Daniel Lee](#)<sup>2</sup>, [Ratik Kapoor](#)<sup>2</sup>, [Gurmukh Singh](#)<sup>2</sup>, [Lisa Oberding](#)<sup>1</sup>, [Omar Abdullah](#)<sup>1</sup>, [Keekyoung Kim](#)<sup>2,4</sup>, [Byron M. Berenger](#)<sup>5,6</sup>, [Dylan R. Pillai](#)<sup>\*1,5,6,7</sup>

1. Department of Microbiology, Immunology, and Infectious Diseases, University of Calgary, AB, Canada
2. Department of Mechanical and Manufacturing Engineering, University of Calgary, AB, Canada
3. School of Engineering, University of British Columbia, Kelowna, BC, Canada
4. Biomedical Engineering Graduate Program, University of Calgary, AB, Canada
5. Clinical Section of Microbiology, Alberta Precision Laboratories, Calgary, AB, Canada
6. Department Pathology and Laboratory Medicine, University of Calgary, Calgary, AB, Canada
7. Clinical Section of Infectious Diseases, Department of Medicine, University of Calgary, Calgary, AB, Canada

\*Corresponding author:

Dylan Pillai MD, PhD

Departments of Pathology, Medicine, and Microbiology, Immunology, and Infectious Diseases  
University of Calgary

9-3535 Research Road NW, 1W-416

Calgary, AB, Canada, T2L2K8

[drpillai@ucalgary.ca](mailto:drpillai@ucalgary.ca)

T: +1 403-770-3338

F: +1 403-770-3347

## Supplementary Materials:

Table S1. Saliva-LAMP demonstrates no cross-reactivity with a panel of 11 respiratory pathogens

| Pathogen                           | Strain                          | Concentration                                                       | Result   | Agreement with Expected Results |
|------------------------------------|---------------------------------|---------------------------------------------------------------------|----------|---------------------------------|
| <i>Staphylococcus aureus</i>       | COL (MRSA)                      | 10-fold dilution of stock that yields a Ct value of 18.5-21 by PCR  | Negative | 100% (1/1)                      |
| <i>Streptococcus pneumonia</i>     | Z022                            | 10-fold dilution of stock that yields a Ct value of 26-28 by PCR    | Negative | 100% (1/1)                      |
| Influenza A H3                     | A/Brisbane/10/07                | 10-fold dilution of stock that yields a Ct value of 22-25 by RT-PCR | Negative | 100% (1/1)                      |
| Influenza B                        | B/Florida/02/06                 | 10-fold dilution of stock that yields a Ct value of 19-22 by RT-PCR | Negative | 100% (1/1)                      |
| RSV A2                             | N/A                             | 10-fold dilution of stock that yields a Ct value of 29-32 by RT-PCR | Negative | 100% (1/1)                      |
| Coronavirus 229E                   | N/A                             | 10-fold dilution of stock that yields a Ct value of 25-28 by RT-PCR | Negative | 100% (1/1)                      |
| Coronavirus NL63                   | N/A                             | 10-fold dilution of stock that yields a Ct value of 27-30 by RT-PCR | Negative | 100% (1/1)                      |
| MERS                               | Florida/USA-2_Saudi Arabia_2014 | 10-fold dilution of stock that yields a Ct value of 25-28 by RT-PCR | Negative | 100% (1/1)                      |
| Coronavirus OC43                   | N/A                             | 10-fold dilution of stock that yields a Ct value of 25-28 by RT-PCR | Negative | 100% (1/1)                      |
| SARS                               | 2003-00592                      | 10-fold dilution of stock that yields a Ct value of 25-28 by RT-PCR | Negative | 100% (1/1)                      |
| Coronavirus HKU1                   | N/A                             | 10-fold dilution of stock that yields a Ct value of 22-25 by RT-PCR | Negative | 100% (1/1)                      |
| Positive Control (SARS-CoV-2, MS2) |                                 | 10 X LOD                                                            | Positive | 100% (1/1)                      |
| Negative Control                   |                                 | -                                                                   | Negative | 100% (1/1)                      |

Table S2. Saliva-LAMP is impervious to a wide variety of household medications and substances that may be in patient samples.

†Samples were prepared to 9 X LOD before they underwent an additional freeze-thaw step, further reducing the viral titre by an unknown factor

| Substance/Trade Name                      | Active Ingredient                                          | Ingredient Concentration in Spiked Saliva-UTM Sample                                                                                      | Viral Titre in Input Saliva-UTM Sample† | % Agreement with Expected Results |
|-------------------------------------------|------------------------------------------------------------|-------------------------------------------------------------------------------------------------------------------------------------------|-----------------------------------------|-----------------------------------|
| Tylenol Extra Strength                    | Acetaminophen                                              | Approximately 1.7 mg/mL                                                                                                                   | 9 X LOD                                 | 100% (1/1)                        |
|                                           |                                                            |                                                                                                                                           | NTC                                     | 100% (1/1)                        |
| Aspirin Extra Strength                    | Acetylsalicylic Acid                                       | Approximately 12.3 mg/mL                                                                                                                  | 9 X LOD                                 | 100% (1/1)                        |
|                                           |                                                            |                                                                                                                                           | NTC                                     | 100% (1/1)                        |
| Colgate Total Mouthwash                   | Cetylpyridinium Chloride                                   | 0.005% (w/w)                                                                                                                              | 9 X LOD                                 | 100% (1/1)                        |
|                                           |                                                            |                                                                                                                                           | NTC                                     | 100% (1/1)                        |
| Cepacol® Sore Throat Lozenges             | Benzocaine and Menthol                                     | Approximately 0.08 mg/mL benzocaine and 0.02 mg/mL menthol                                                                                | 9 X LOD                                 | 100% (1/1)                        |
|                                           |                                                            |                                                                                                                                           | NTC                                     | 100% (1/1)                        |
| Chloraseptic® Sore Throat Spray           | Phenol                                                     | 0.07% (w/v)                                                                                                                               | 9 X LOD                                 | 100% (1/1)                        |
|                                           |                                                            |                                                                                                                                           | NTC                                     | 100% (1/1)                        |
| Dristan Tablets                           | Chlorpheniramine Maleate, Acetaminophen, Phenylephrine HCl | Approximately 0.06 mg/mL (Chlorpheniramine maleate), Approximately 6.5 mg/mL (Acetaminophen), Approximately 0.1 mg/mL (Phenylephrine HCl) | 9 X LOD                                 | 100% (1/1)                        |
|                                           |                                                            |                                                                                                                                           | NTC                                     | 100% (1/1)                        |
| Dimetapp                                  | Bromopheniramine Maleate, Phenylephrine HCl                | 0.064 mg/mL (Bromopheniramine Maleate), 0.16 mg/mL (Phenylephrine HCl)                                                                    | 9 X LOD                                 | 100% (1/1)                        |
|                                           |                                                            |                                                                                                                                           | NTC                                     | 100% (1/1)                        |
| Colgate Triple Action Fluoride Toothpaste | Sodium fluoride                                            | Approximately 0.075% (w/w)                                                                                                                | 9 X LOD                                 | 100% (1/1)                        |
|                                           |                                                            |                                                                                                                                           | NTC                                     | 100% (1/1)                        |
| Benadryl Extra Strength                   | Diphenhydramine HCl                                        | Approximately 2.7 mg/mL                                                                                                                   | 9 X LOD                                 | 100% (1/1)                        |
|                                           |                                                            |                                                                                                                                           | NTC                                     | 100% (1/1)                        |

|                                                       |                                                                  |                                                                                                                |         |            |
|-------------------------------------------------------|------------------------------------------------------------------|----------------------------------------------------------------------------------------------------------------|---------|------------|
| HALLS® Kids Sore Throat Lozenges Strawberry Flavoured | Menthol                                                          | Approximately 0.08 mg/mL                                                                                       | 9 X LOD | 100% (1/1) |
|                                                       |                                                                  |                                                                                                                | NTC     | 100% (1/1) |
| Extra Strength Ibuprofen Liquid Gel Capsules          | Ibuprofen                                                        | Approximately 6 mg/mL                                                                                          | 9 X LOD | 100% (1/1) |
|                                                       |                                                                  |                                                                                                                | NTC     | 100% (1/1) |
| Listerine Freshburst                                  | Menthol, Thymol, and Eucalyptol                                  | 0.0042% (w/v) menthol%, 0.0063 (w/v) thymol, 0.0091% (w/v) eucalyptol                                          | 9 X LOD | 100% (1/1) |
|                                                       |                                                                  |                                                                                                                | NTC     | 100% (1/1) |
| Rub A535                                              | Methyl Salicylate, Eucalyptus Essential Oil                      | 0.0060% (w/w) (Methyl Salicylate), 0.0006% (w/w) (Eucalyptus Essential Oil)                                    | 9 X LOD | 100% (1/1) |
|                                                       |                                                                  |                                                                                                                | NTC     | 100% (1/1) |
| Benylin Extra Strength Dry Cough                      | Dextromethorphan HBr                                             | 0.2 mg/mL                                                                                                      | 9 X LOD | 100% (1/1) |
|                                                       |                                                                  |                                                                                                                | NTC     | 100% (1/1) |
| Robitussin Cough & Cold Extra Strength                | Dextromethorphan HBr, Guaifenesin, Pseudoephedrine Hydrochloride | 0.2 mg/mL (Dextromethorphan Hydrobromide), 2.67 mg/mL (Guaifenesin), 0.4 mg/mL (Pseudoephedrine Hydrochloride) | 9 X LOD | 100% (1/1) |
|                                                       |                                                                  |                                                                                                                | NTC     | 100% (1/1) |
| Robitussin Mucus and Phlegm                           | Guaifenesin                                                      | 2.0 mg/mL                                                                                                      | 9 X LOD | 100% (1/1) |
|                                                       |                                                                  |                                                                                                                | NTC     | 100% (1/1) |
| Jamieson Extra Strength Zinc Supplement (50 mg)       | Zinc Gluconate                                                   | Approximately 1 mg/mL                                                                                          | 9 X LOD | 100% (1/1) |
|                                                       |                                                                  |                                                                                                                | NTC     | 100% (1/1) |
| Human Blood                                           | N/A                                                              | 10% (v/v)                                                                                                      | 9 X LOD | 100% (1/1) |
|                                                       |                                                                  |                                                                                                                | NTC     | 100% (1/1) |
| No Interfering Substances                             | N/A                                                              | N/A                                                                                                            | 9 X LOD | 100% (1/1) |
|                                                       |                                                                  |                                                                                                                | NTC     | 100% (1/1) |



Table S4. Assessment of precision of saliva-LAMP using two samples twice per day for twenty days (20 X 2 X 2).

|        |         | Negative Control | Positive Control | Replicate 1 (10 copy/ $\mu$ L) | Replicate 2 (10 copy/ $\mu$ L) |
|--------|---------|------------------|------------------|--------------------------------|--------------------------------|
| Day 1  | Round 1 | Negative         | Positive         | Positive                       | Positive                       |
|        | Round 2 | Negative         | Positive         | Positive                       | Positive                       |
| Day 2  | Round 1 | Negative         | Positive         | Positive                       | Positive                       |
|        | Round 2 | Negative         | Positive         | Positive                       | Positive                       |
| Day 3  | Round 1 | Negative         | Positive         | Positive                       | Positive                       |
|        | Round 2 | Negative         | Positive         | Positive                       | Positive                       |
| Day 4  | Round 1 | Negative         | Positive         | Positive                       | Positive                       |
|        | Round 2 | Negative         | Positive         | Positive                       | Positive                       |
| Day 5  | Round 1 | Negative         | Positive         | Positive                       | Positive                       |
|        | Round 2 | Negative         | Positive         | Positive                       | Positive                       |
| Day 6  | Round 1 | Negative         | Positive         | Positive                       | Positive                       |
|        | Round 2 | Negative         | Positive         | Positive                       | Positive                       |
| Day 7  | Round 1 | Negative         | Positive         | Positive                       | Positive                       |
|        | Round 2 | Negative         | Positive         | Positive                       | Positive                       |
| Day 8  | Round 1 | Negative         | Positive         | Positive                       | Positive                       |
|        | Round 2 | Negative         | Positive         | Positive                       | Positive                       |
| Day 9  | Round 1 | Negative         | Positive         | Positive                       | Positive                       |
|        | Round 2 | Negative         | Positive         | Positive                       | Positive                       |
| Day 10 | Round 1 | Negative         | Positive         | Positive                       | Positive                       |
|        | Round 2 | Negative         | Positive         | Positive                       | Positive                       |
| Day 11 | Round 1 | Negative         | Positive         | Positive                       | Positive                       |
|        | Round 2 | Negative         | Positive         | Positive                       | Positive                       |
| Day 12 | Round 1 | Negative         | Positive         | Positive                       | Positive                       |
|        | Round 2 | Negative         | Positive         | Positive                       | Positive                       |
| Day 13 | Round 1 | Negative         | Positive         | Positive                       | Positive                       |
|        | Round 2 | Negative         | Positive         | Positive                       | Positive                       |
| Day 14 | Round 1 | Negative         | Positive         | Positive                       | Positive                       |
|        | Round 2 | Negative         | Positive         | Positive                       | Positive                       |
| Day 15 | Round 1 | Negative         | Positive         | Positive                       | Positive                       |
|        | Round 2 | Negative         | Positive         | Positive                       | Positive                       |
| Day 16 | Round 1 | Negative         | Positive         | Positive                       | Positive                       |

|               |                |          |          |          |          |
|---------------|----------------|----------|----------|----------|----------|
|               | <b>Round 2</b> | Negative | Positive | Positive | Positive |
| <b>Day 17</b> | <b>Round 1</b> | Negative | Positive | Positive | Positive |
|               | <b>Round 2</b> | Negative | Positive | Positive | Positive |
| <b>Day 18</b> | <b>Round 1</b> | Negative | Positive | Positive | Positive |
|               | <b>Round 2</b> | Negative | Positive | Positive | Positive |
| <b>Day 19</b> | <b>Round 1</b> | Negative | Positive | Positive | Positive |
|               | <b>Round 2</b> | Negative | Positive | Positive | Positive |
| <b>Day 20</b> | <b>Round 1</b> | Negative | Positive | Positive | Positive |
|               | <b>Round 2</b> | Negative | Positive | Positive | Positive |

Table S5. Capital cost of Saliva-dry LAMP commercially acquired instrument.

| <b>Instrument</b>                               | <b>Cost Per Unit (CAD)</b>                                |
|-------------------------------------------------|-----------------------------------------------------------|
| mySPIN™ 12 Mini Centrifuge                      | \$1582.20 [36]                                            |
| IncuBlock™ Mini Dry Bath                        | \$252.00 [37]                                             |
| 2 X Aluminum blocks (for 0.2 mL and 2 mL tubes) | \$174 [37]                                                |
| Ultra Slim LED Transilluminator                 | \$526.75 [38]                                             |
| <b>Total Capital Cost</b>                       | <b>\$2534.95 (US\$1977.44, Dec 8, 2020 exchange rate)</b> |

Table S6. Capital cost of Saliva-dry LAMP Biobox (major items listed)

| <b>Instrument</b>         | <b>Cost Per Unit (CAD)</b>                              |
|---------------------------|---------------------------------------------------------|
| Fan                       | \$56.19                                                 |
| Cable                     | \$46.38                                                 |
| Heat block & machining    | \$130.29                                                |
| Motor                     | \$38.43                                                 |
| Other                     | \$224.46                                                |
| <b>Total Capital Cost</b> | <b>\$495.75 (US\$386.72, Dec 8, 2020 exchange rate)</b> |

Figure S1. Cycle threshold (Ct) values based on reference RT-PCR methods of the concomitant NP swab for all SARSCoV2-positive saliva samples used in the clinical validation (n=30).

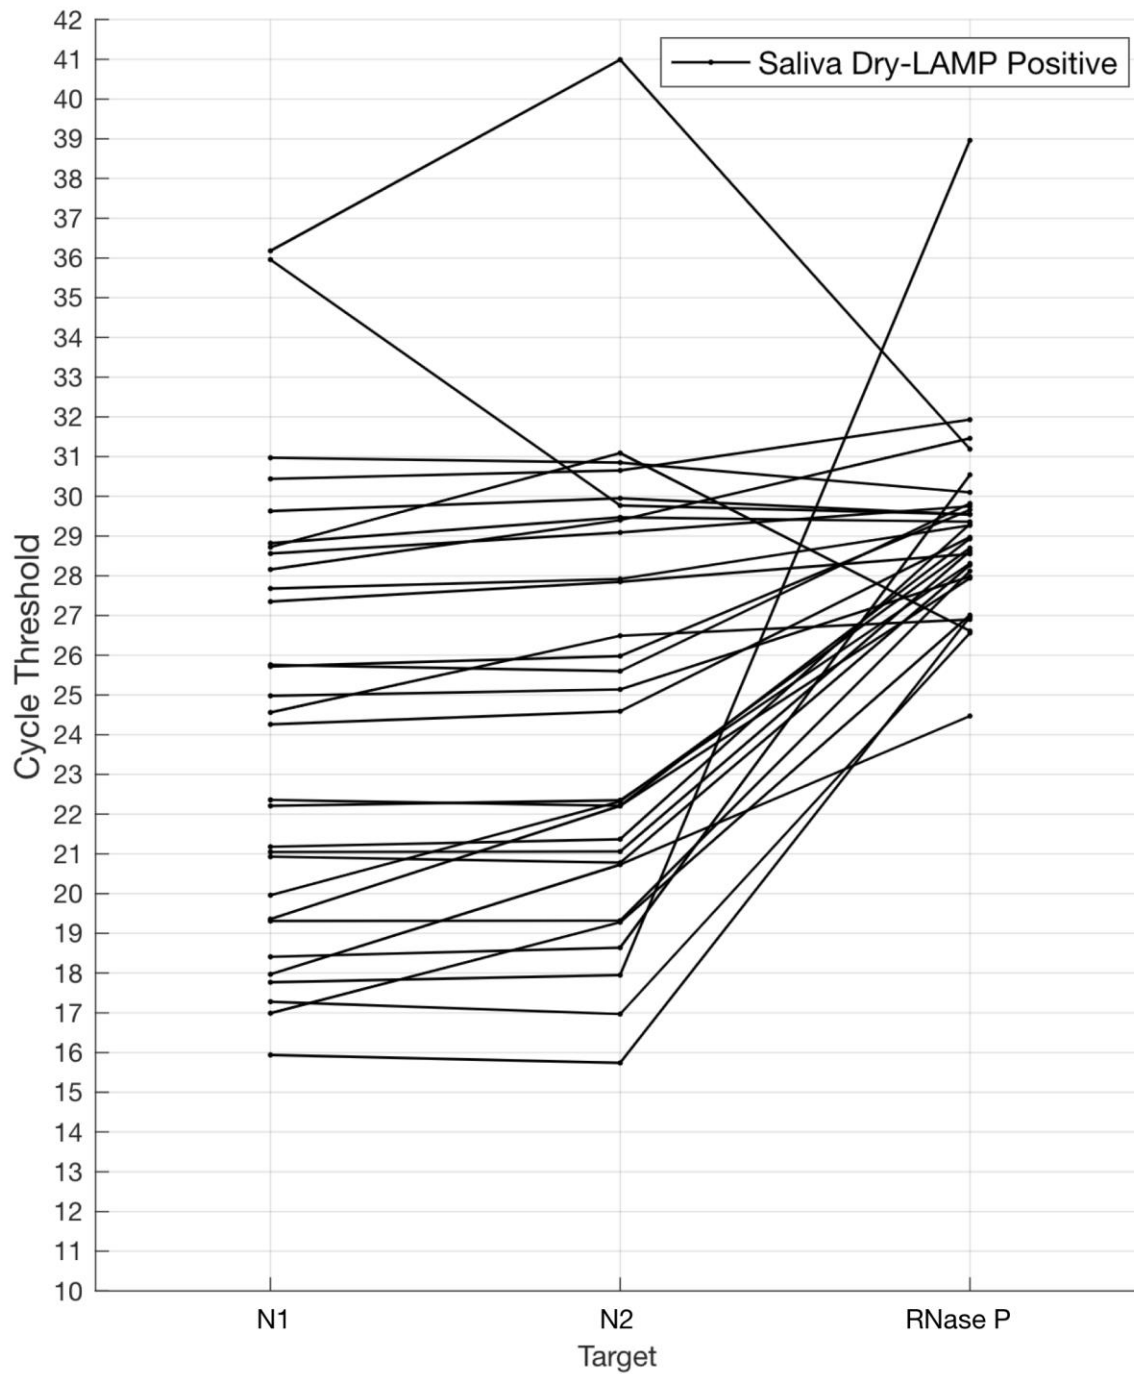

Supplement: Supplementary file 1 [file 2874ec9afa55d6ea546f5ad4.pdf]
